# Supplementary material
Source: MDPI journal article supplement (https://www.mdpi.com/2071-1050/12/18/7816)
Supplement: s1 [file s1]

Article

# **“Predator-In-First”: A Preemptive Biological Control Strategy for Sustainable Management of Pepper Pests in Florida**

**Vivek Kumar <sup>1,\*</sup>, Lucky Mehra <sup>2</sup>, Cindy L. McKenzie <sup>3</sup>, and Lance S. Osborne <sup>1</sup>**

<sup>1</sup> Mid-Florida Research and Education Center, IFAS, University of Florida, 2725 S. Binion Road, Apopka, 32703, FL, USA; lsosborn@ufl.edu

<sup>2</sup> Department of Plant Pathology, Kansas State University, Manhattan, 66506, KS, USA; luckymehra@ksu.edu

<sup>3</sup> Horticultural Research Laboratory, Subtropical Insect Research Unit, USDA-ARS, U.S., 2001 South Rock Road, Fort Pierce, 34945, FL, USA; cindy.mckenzie@usda.gov

\* Correspondence: vivekuf@gmail.com

---

## Supplementary

**Table S1.** Generalized linear mixed model statistics for abundance of arthropods in the greenhouse and field trials.

| Sampling unit | Arthropod              | Effect                 | Greenhouse study - fall season  |          |          | Greenhouse study - spring season   |          |          |                                 |          |          |  |
|---------------|------------------------|------------------------|---------------------------------|----------|----------|------------------------------------|----------|----------|---------------------------------|----------|----------|--|
|               |                        |                        | <i>df</i>                       | <i>F</i> | <i>P</i> | <i>df</i>                          | <i>F</i> | <i>P</i> |                                 |          |          |  |
| Leaf          | <i>B. tabaci</i>       | Treatment <sup>a</sup> | 5, 235                          | 59.86    | <0.0001  | 5, 235                             | 48.43    | <0.0001  |                                 |          |          |  |
|               |                        | Week <sup>b</sup>      | 7, 235                          | 53.33    | <0.0001  | 7, 235                             | 51.61    | <0.0001  |                                 |          |          |  |
|               |                        | Treatment*week         | 35, 235                         | 4.74     | <0.0001  | 35, 235                            | 1.97     | 0.0017   |                                 |          |          |  |
|               | <i>A. swirskii</i>     | Treatment              | 5, 235                          | 222.83   | <0.0001  | 5, 235                             | 70.63    | <0.0001  |                                 |          |          |  |
|               |                        | Week                   | 7, 235                          | 137.60   | <0.0001  | 7, 235                             | 87.51    | <0.0001  |                                 |          |          |  |
|               |                        | Treatment*week         | 35, 235                         | 13.01    | <0.0001  | 35, 235                            | 7.94     | <0.0001  |                                 |          |          |  |
| Flower        | <i>F. occidentalis</i> | Treatment              | 5, 205                          | 8.02     | <0.0001  | 5, 205                             | 4.52     | 0.0006   |                                 |          |          |  |
|               |                        | Week                   | 6, 205                          | 3.12     | 0.0060   | 6, 205                             | 23.29    | <0.0001  |                                 |          |          |  |
|               |                        | Treatment*week         | 30, 205                         | 1.86     | 0.0066   | 30, 205                            | 1.19     | 0.2387   |                                 |          |          |  |
|               | <i>A. swirskii</i>     | Treatment              | 5, 205                          | 10.93    | <0.0001  | 5, 205                             | 2.59     | 0.0267   |                                 |          |          |  |
|               |                        | Week                   | 6, 205                          | 4.61     | 0.0002   | 6, 205                             | 3.70     | 0.0016   |                                 |          |          |  |
|               |                        | Treatment*week         | 30, 205                         | 1.21     | 0.2020   | 30, 205                            | 1.12     | 0.3116   |                                 |          |          |  |
|               |                        |                        | First field study – fall season |          |          | Second field study – spring season |          |          | Third field study – fall season |          |          |  |
|               |                        |                        | <i>df</i>                       | <i>F</i> | <i>P</i> | <i>df</i>                          | <i>F</i> | <i>P</i> | <i>df</i>                       | <i>F</i> | <i>P</i> |  |
| Leaf          | <i>B. tabaci</i>       | Treatment              | 7, 315                          | 6.25     | <0.0001  | 7, 395                             | 5.45     | <0.0001  | 7, 315                          | 3.520    | 0.0012   |  |
|               |                        | Week                   | 7, 315                          | 50.34    | <0.0001  | 9, 395                             | 14.69    | <0.0001  | 7, 315                          | 17.76    | <0.0001  |  |
|               |                        | Treatment*week         | 49, 315                         | 1.53     | 0.0168   | 63, 395                            | 1.61     | 0.0040   | 49, 315                         | 2.09     | <0.0001  |  |
|               | <i>P. latus</i>        | Treatment              | 7, 315                          | 21.94    | <0.0001  | -                                  | -        | -        | 7, 315                          | 7.08     | <0.0001  |  |
|               |                        | Week                   | 7, 315                          | 55.69    | <0.0001  | -                                  | -        | -        | 7, 315                          | 55.56    | <0.0001  |  |
|               |                        | Treatment*week         | 49, 315                         | 6.01     | <0.0001  | -                                  | -        | -        | 49, 315                         | 2.35     | <0.0001  |  |
|               | <i>A. swirskii</i>     | Treatment              | 7, 315                          | 35.43    | <0.0001  | 7, 395                             | 7.97     | <0.0001  | 7, 315                          | 19.77    | <0.0001  |  |
|               |                        | Week                   | 7, 315                          | 47.51    | <0.0001  | 9, 395                             | 28.69    | <0.0001  | 7, 315                          | 11.89    | <0.0001  |  |
|               |                        | Treatment*week         | 49, 315                         | 5.70     | <0.0001  | 63, 395                            | 2.15     | <0.0001  | 49, 315                         | 2.30     | <0.0001  |  |
| Flower        | <i>F. occidentalis</i> | Treatment              | 7, 235                          | 1.12     | 0.3510   | 7, 275                             | 2.69     | 0.0103   | 7, 235                          | 1.63     | 0.1278   |  |
|               |                        | Week                   | 5, 235                          | 64.86    | <0.0001  | 6, 275                             | 283.97   | <0.0001  | 5, 235                          | 145.10   | <0.0001  |  |

|                    |                |         |       |         |         |      |        |         |      |        |
|--------------------|----------------|---------|-------|---------|---------|------|--------|---------|------|--------|
| <i>A. swirskii</i> | Treatment*week | 35, 235 | 1.24  | 0.1777  | 42, 275 | 2.15 | 0.0001 | 35, 235 | 0.76 | 0.8346 |
|                    | Treatment      | 7, 235  | 10.49 | <0.0001 | 7, 275  | 0.89 | 0.5182 | 7, 235  | 2.61 | 0.0129 |
|                    | Week           | 5, 235  | 14.21 | <0.0001 | 6, 275  | 2.40 | 0.0284 | 5, 235  | 1.72 | 0.0002 |
|                    | Treatment*week | 35, 235 | 2.51  | <0.0001 | 42, 275 | 0.93 | 0.6024 | 35, 235 | 1.26 | 0.0608 |

<sup>a</sup> In greenhouse trials, treatments were defined based on the rate of *Amblyseius swirskii* (0, 20, or 40) released per seedling on either '7039' or '7141' pepper cultivar before planting, i.e., a total of six treatments. While in field trials, *A. swirskii* release rates were 0, 20, 40, per seedling or a sachet per 10 seedlings of either 7039 or 7141 pepper cultivars, making a total of 8 treatments; <sup>b</sup> Sampling was conducted weekly for 8 weeks period in greenhouse trials, and 8–10 weeks in field trials.

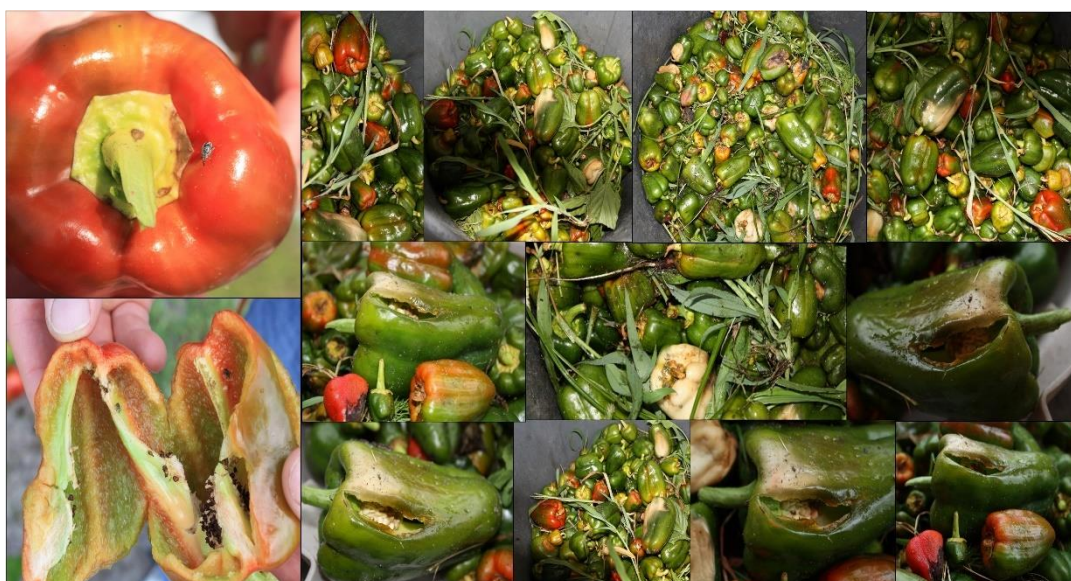

**Figure S1.** *Anthonomus eugenii* damage observed in different pepper plots during spring field production season.

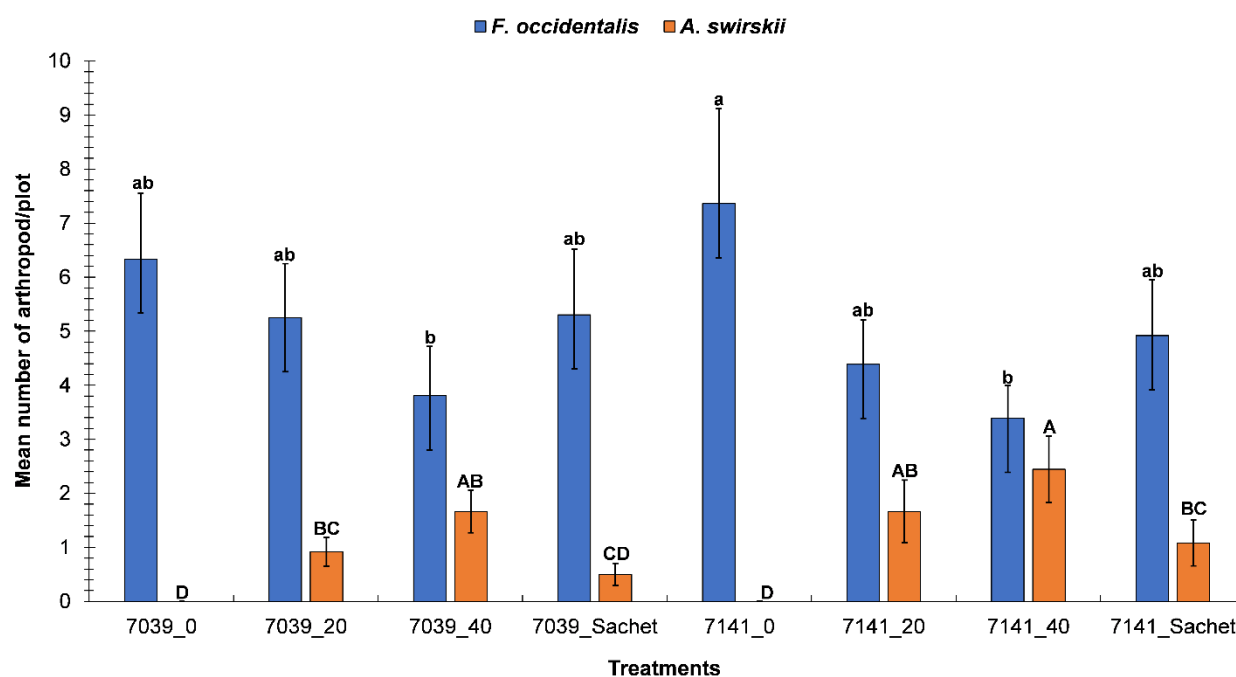

**Figure S2.** Mean number ( $\pm$  SE) of *Frankliniella occidentalis* and *Amblyseius swirskii* observed per plot in pepper flowers during first fall field study. Bars with different lower-case letters shows significant difference among treatments for abundance of *F. occidentalis*, and upper-case letters represents difference between treatments for *A. swirskii* (Fisher's LSD test,  $p < 0.05$ ).

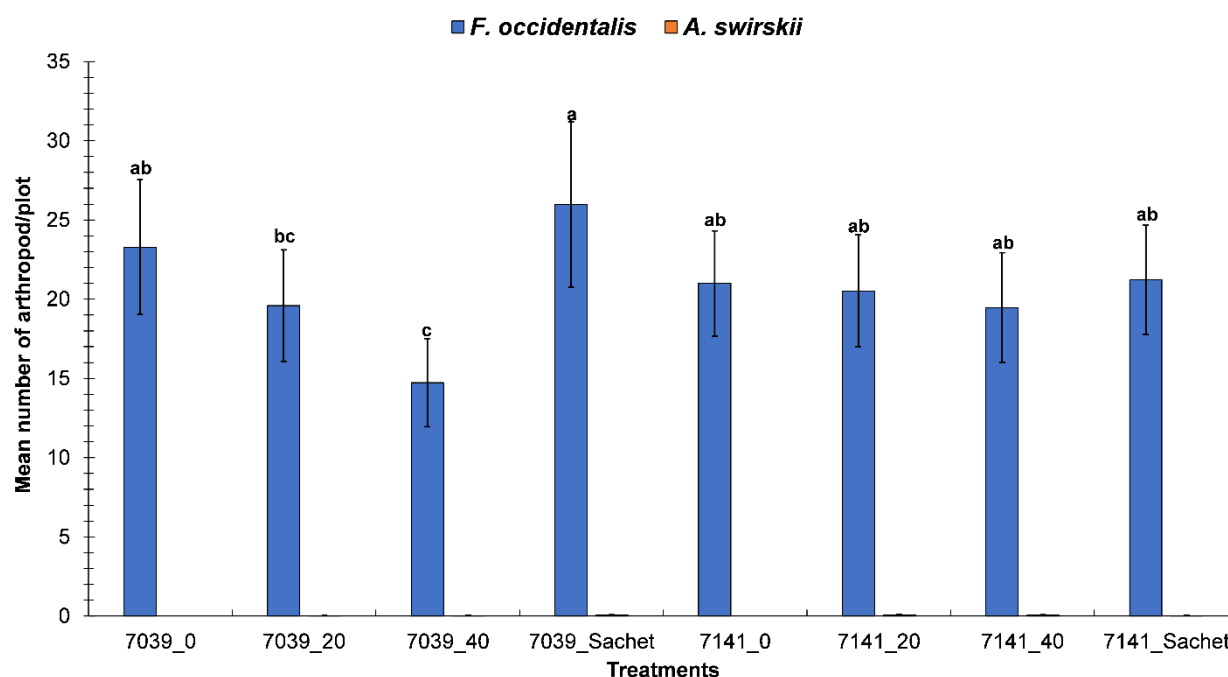

**Figure S3.** Mean number ( $\pm$  SE) of *Frankliniella occidentalis* and *Amblyseius swirskii* observed per plot in pepper flowers during spring field study. Treatment bars with different lower-case letters are significantly different (Fisher's LSD test,  $p < 0.05$ ).

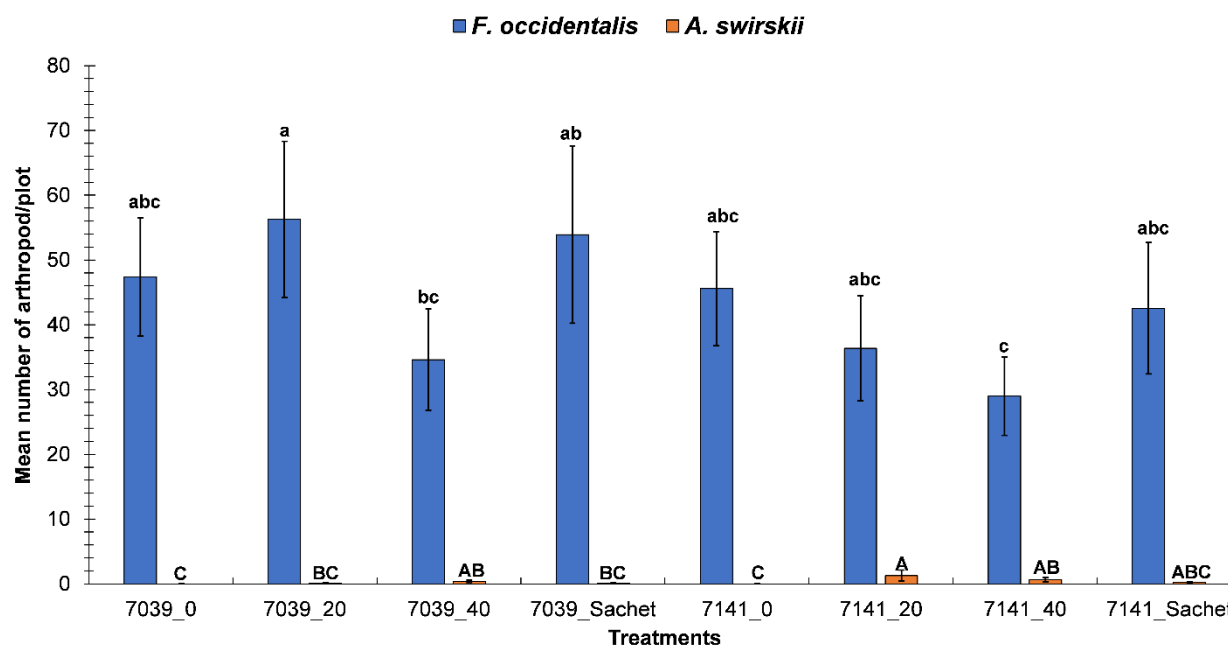

**Figure S4.** Mean number ( $\pm$  SE) of *Frankliniella occidentalis* and *Amblyseius swirskii* observed per plot in pepper flowers during second fall field study. Bars with different lower-case letters shows significant difference among treatments for abundance of *F. occidentalis*, and upper-case letters represents difference between treatments for *A. swirskii* (Fisher's LSD test,  $p < 0.05$ ).

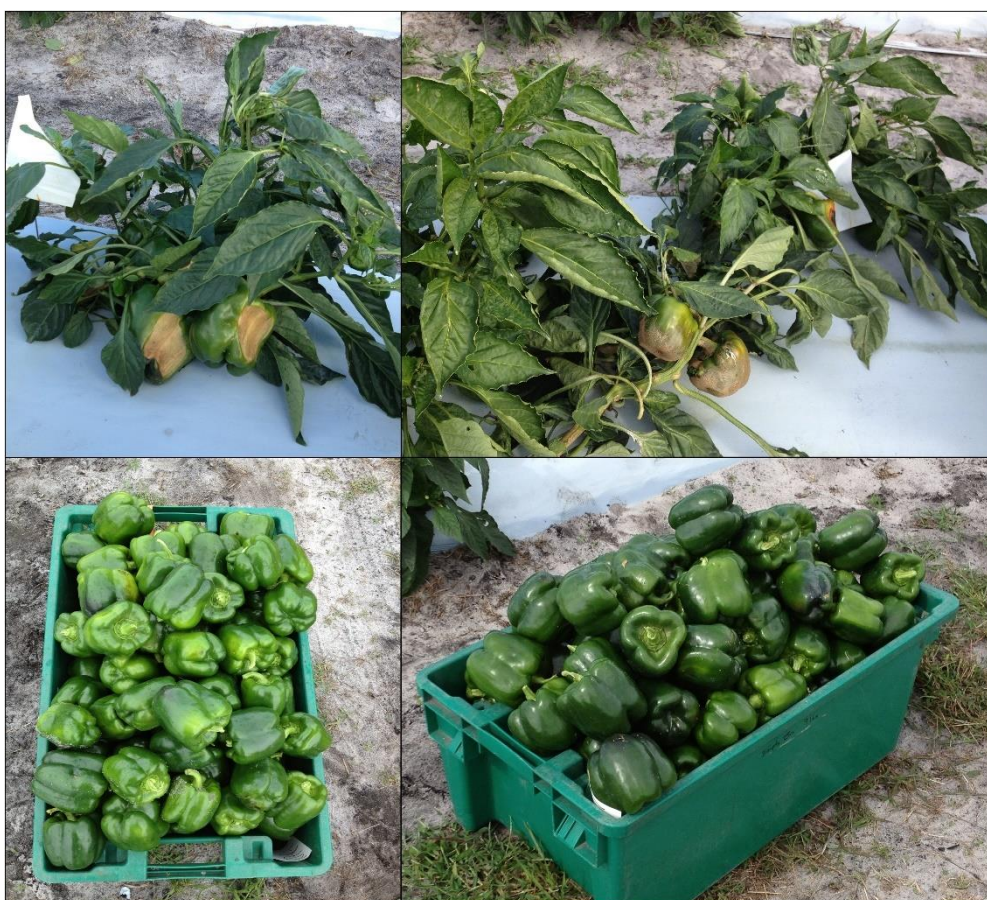

**Figure S5.** Pepper fruits from control plot (on top) exhibiting heavy *Polyphagotarsonemus latus* damage, and the treatment with the high rate of 40 *Amblyseius swirskii* per pepper plant (on bottom) during second fall harvest.
